# Supplementary material for: Expert Performance in Action Anticipation: Visual Search Behavior in Volleyball Spiking Defense from Different Viewing Perspectives
Source: MDPI journal article supplement (doi:10.3390/bs14030163), 2024-02-22
Supplement: s1 [file s1]

## Supplementary

**Table S1.** Response accuracy (%) rates by group and perspective.

|                  | Competitive elite |      | Semi elite |      | Novices |       | All participants |      |
|------------------|-------------------|------|------------|------|---------|-------|------------------|------|
|                  | Mean              | SD   | Mean       | SD   | Mean    | SD    | Mean             | SD   |
| All perspectives | 58.5              | 3.25 | 56.2       | 5.01 | 49.9    | 4.82  | 55.24            | 5.60 |
| Baseline         | 61.90             | 4.69 | 61.54      | 8.08 | 53.87   | 7.29  | 59.45            | 7.50 |
| Zone 1           | 59.34             | 6.35 | 50.30      | 5.32 | 43.36   | 8.79  | 51.62            | 9.36 |
| Zone 6           | 52.47             | 9.25 | 57.10      | 8.14 | 48.95   | 7.71  | 53.04            | 8.86 |
| Zone 5           | 60.16             | 5.14 | 55.92      | 8.25 | 53.15   | 12.38 | 56.68            | 9.02 |

**Table S2.** Total fixation duration (ms) among perspectives.

|          | All participants |        |
|----------|------------------|--------|
|          | Mean             | SD     |
| Baseline | 2,512.51         | 357.66 |
| Zone 1   | 2,358.31         | 379.35 |
| Zone 6   | 2,294.81         | 425.61 |
| Zone 5   | 2,305.99         | 434.00 |

**Table S3.** Number of fixations by group and perspective.

|                  | Competitive elite |      | Semi elite |      | Novices |      | All participants |      |
|------------------|-------------------|------|------------|------|---------|------|------------------|------|
|                  | Mean              | SD   | Mean       | SD   | Mean    | SD   | Mean             | SD   |
| All perspectives | 7.42              | 1.34 | 8.25       | 1.06 | 9.22    | 0.93 | 8.22             | 1.45 |
| Baseline         | 6.83              | 1.23 | 7.61       | 1.16 | 8.86    | 1.20 | 7.68             | 1.43 |
| Zone 1           | 7.98              | 1.36 | 8.88       | 1.27 | 9.63    | 1.12 | 8.76             | 1.41 |
| Zone 6           | 7.45              | 1.73 | 8.25       | 1.00 | 9.26    | 1.05 | 8.25             | 1.49 |
| Zone 5           | 7.43              | 1.48 | 8.28       | 1.19 | 9.16    | 1.31 | 8.22             | 1.48 |

**Table S4.** First fixation duration (ms) by group and perspective.

|                  | Competitive elite |       | Semi elite |        | Novices |       |
|------------------|-------------------|-------|------------|--------|---------|-------|
|                  | Mean              | SD    | Mean       | SD     | Mean    | SD    |
| All perspectives | 264.76            | 84.92 | 256.59     | 44.02  | 231.30  | 47.82 |
| Baseline         | 296.52            | 72.35 | 283.24     | 87.64  | 237.86  | 56.94 |
| Zone 1           | 221.42            | 52.16 | 260.60     | 76.07  | 212.36  | 47.16 |
| Zone 6           | 242.23            | 53.00 | 268.01     | 104.67 | 237.38  | 54.55 |
| Zone 5           | 239.00            | 55.05 | 276.63     | 91.11  | 237.34  | 48.74 |

**Table S5.** AOIs fixation proportion (%) among perspectives in pre-spiking phase

| Perspective<br>AOIs | All   |      | Baseline |      | Zone1 |      | Zone 6 |      | Zone 5 |      |
|---------------------|-------|------|----------|------|-------|------|--------|------|--------|------|
|                     | Mean  | SD   | Mean     | SD   | Mean  | SD   | Mean   | SD   | Mean   | SD   |
| Setter              | 18.43 | 3.62 | 26.44    | 6.20 | 15.28 | 5.56 | 14.76  | 4.47 | 16.94  | 3.53 |
| Zone2               | 8.12  | 1.42 | 8.68     | 2.88 | 5.97  | 1.00 | 8.75   | 2.60 | 9.08   | 1.54 |
| Zone3               | 11.02 | 2.09 | 15.07    | 3.57 | 11.15 | 2.95 | 15.54  | 3.63 | 2.15   | 1.20 |
| Zone4               | 6.49  | 2.11 | 8.02     | 3.39 | 6.06  | 1.39 | 8.78   | 3.72 | 3.04   | 1.26 |
| Shoulder            | 2.32  | 1.50 | 1.70     | 1.20 | 2.11  | 1.68 | 3.19   | 2.76 | 2.31   | 1.91 |
| All1                | 11.01 | 2.45 | 14.55    | 4.21 | 9.61  | 3.26 | 11.96  | 3.67 | 7.80   | 2.11 |

Notes: AOIs, areas of interest.

**Table S6.** AOIs fixation proportion (%) among perspectives in spiking phase

| Perspective<br>AOIs | All  |      | Baseline |      | Zone1 |      | Zone 6 |      | Zone 5 |      |
|---------------------|------|------|----------|------|-------|------|--------|------|--------|------|
|                     | Mean | SD   | Mean     | SD   | Mean  | SD   | Mean   | SD   | Mean   | SD   |
| Shoulder            | 2.32 | 1.50 | 1.70     | 1.20 | 2.11  | 1.68 | 3.19   | 2.76 | 2.31   | 1.91 |
| Trunk               | 1.10 | 0.63 | 1.73     | 1.61 | 0.97  | 0.68 | 1.02   | 0.64 | 0.63   | 0.56 |
| Wrist-Arm           | 1.93 | 0.95 | 1.18     | 0.71 | 2.05  | 1.46 | 2.50   | 2.11 | 2.00   | 1.81 |
| Head                | 1.83 | 1.16 | 0.98     | 0.89 | 2.23  | 1.62 | 2.28   | 2.19 | 1.85   | 1.69 |
| Ball                | 4.12 | 2.38 | 1.71     | 1.39 | 4.86  | 3.60 | 3.85   | 2.95 | 6.14   | 3.78 |
| All AOIs            | 2.26 | 1.45 | 1.46     | 1.20 | 2.44  | 2.05 | 2.57   | 2.28 | 2.58   | 2.21 |

Notes: AOIs, areas of interest.
